# Supplementary material for: Association between high-density lipoprotein cholesterol and all-cause mortality in the general population of northern China
Source: PubMed Central journal article supplement (PMC6783426; doi:10.1038/s41598-019-50924-4), 2019-10-08

**Association between high-density lipoprotein cholesterol and  
all-cause mortality in the general population of northern China**

**Author:** Xintao Li<sup>1</sup>, Bo Guan<sup>1</sup>, Yanjun Wang<sup>1</sup>, Gary Tse<sup>2,3</sup>, Fuquan Zou<sup>3</sup>, Bin Waleed Khalid<sup>3</sup>,  
Yunlong Xia<sup>3</sup>, Shouling Wu<sup>4\*</sup>, Jianhui Sun<sup>1\*</sup>.

**Supplementary Figure 1.** The Kaplan-Meier survival curves for all-cause mortality by HDL-c levels.

**A**

all-cause mortality (age&lt;65)

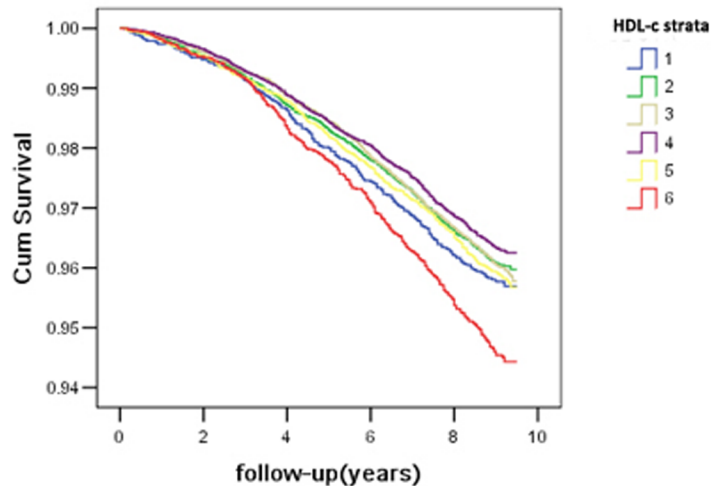**B**

all-cause mortality (age≥65)

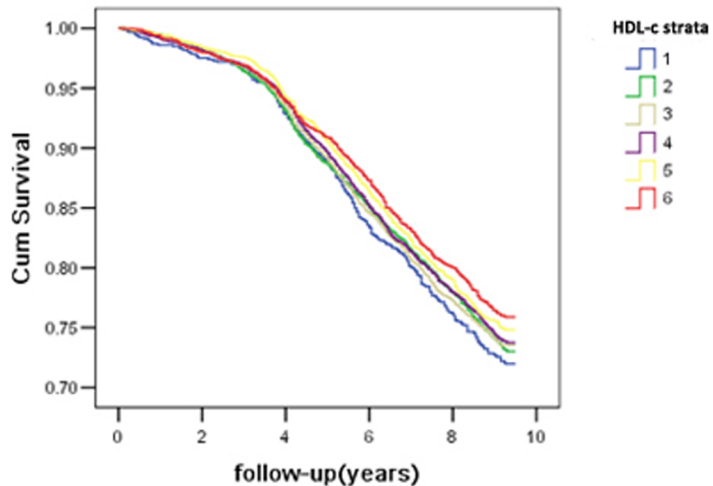

Supplement: 41598_2019_50924_MOESM1_ESM.pdf [file 41598_2019_50924_MOESM1_ESM.pdf]
